# Supplementary material
Source: PubMed Central journal article supplement (PMC6658888)
Supplement: NIHMS1027994-supplement-Appendix.pdf [file NIHMS1027994-supplement-Appendix.pdf]

How risky is it to take a drug like Vicodin for your pain if it was ordered for you last year by your doctor for a different pain?

| Not at all<br>risky (0)  | (1)                      | (2)                      | (3)                      | (4)                      | Extremely<br>risky (5)   |
|--------------------------|--------------------------|--------------------------|--------------------------|--------------------------|--------------------------|
| <input type="checkbox"/> |

### Scenario Decision-Making

**2) You just had your wisdom teeth out and the dentist prescribed Vicodin 1-2 tablets every 4 hours as needed.** You took 2 Vicodin tablets about **2 1/2 hours ago**, and have been mostly sleeping since. You wake up with terrible pain in both sides of your jaw where the teeth were removed. Your friend is worried about your pain, and offers you 2 of the pills (**oxycodone**) that her dentist gave her after the same procedure. She said that this worked great and her pain went away within 15 minutes.

What will you do right now to manage your pain?

- Take 2 of your friend's oxycodone since the pain has been terrible and it worked for her
- Take 1 of your friend's oxycodone
- Take 2 more of the Vicodin your dentist prescribed
- Take 1 of the Vicodin your dentist prescribed
- Take Tylenol or Advil
- Take nothing at this time
- Other \_\_\_\_\_
